# Supplementary material
Source: publisher figshare collection journal article supplement (https://sage.figshare.com/ndownloader/files/14870186)
Supplement: Supplementary file 1 [file 14870186]

## Exploring perceptions of continuity of care among people with long-term mental disorders in Denmark

*Table of transversal themes and subthemes*

| Themes                                 | Subthemes                                              |
|----------------------------------------|--------------------------------------------------------|
| Navigating the system                  | Continuity of contacts                                 |
|                                        | Continuity across sectors and professional disciplines |
|                                        | Continuity between the mental and the physical         |
| Connecting to people and everyday life | Continuity of everyday life                            |
|                                        | Continuity of family and friends                       |
|                                        | Continuity of societal roles                           |
